# Supplementary material for: Bone Marrow Macrophages Induce Inflammation by Efferocytosis of Apoptotic Prostate Cancer Cells via HIF-1α Stabilization
Source: MDPI journal article supplement (doi:10.3390/cells11233712), 2022-11-22
Supplement: s1 [file s1]

## Supplementary Table S1. Key Resources.

| Species/<br>reagent type             | Designation                                            | Source of reference     | Identifiers                                                           | Additional information                                                                                                                                   |
|--------------------------------------|--------------------------------------------------------|-------------------------|-----------------------------------------------------------------------|----------------------------------------------------------------------------------------------------------------------------------------------------------|
| Mouse line                           | C57BL/6J                                               | The Jackson Laboratory  | C57BL/6J (Stock# 000664)                                              |                                                                                                                                                          |
| Mouse line                           | FVB/NJ                                                 | The Jackson Laboratory  | FVB/NJ (Stock# 001800)                                                |                                                                                                                                                          |
| Mouse line                           | <i>Hif1a</i> <sup>mut</sup>                            | The Jackson Laboratory  | B6.129- <i>Hif1a</i> <sup>tm3Rsjr/J</sup> (Stock# 007561)             | Contains loxP sites flanking exon 2 of <i>Hif1a</i> (HIF-1 $\alpha$ ). Exposure to Cre recombinase removes the floxed sequence - creating a null allele. |
| Mouse line                           | <i>Epas1</i> <sup>mut</sup>                            | The Jackson Laboratory  | STOCK <i>Epas1</i> <sup>tm1Mcs/J</sup> (Stock# 008407)                | Contains loxP sites flanking exon 2 of <i>Epas1</i> (HIF-2 $\alpha$ ). Exposure to Cre recombinase results in exon 2 deletion.                           |
| Mouse line                           | LysMCre                                                | The Jackson Laboratory  | B6.129P2- <i>Ly22</i> <sup>tm1(cre)lf6/J</sup> (Stock# 004781)        |                                                                                                                                                          |
| Cell line<br>( <i>Mus musculus</i> ) | Prostate cancer, fibroblast-like (C57BL/6J)            | ATCC                    | RM1 (ATCC, Cat.# CRL-3310)                                            | Ras+Myc-induced prostate cancer that developed from a urogenital sinus mouse prostate reconstitution.                                                    |
| Cell line<br>( <i>Mus musculus</i> ) | Prostate cancer, epithelial-like (FVB/NJ)              | ATCC                    | Myc-CaP (ATCC, Cat.# CRL-3255)                                        | Derived from a genetically engineered mouse prostate cancer removed from an animal that was never exposed to hormone ablation.                           |
| Cell line<br>( <i>Mus musculus</i> ) | Primary Prostate Epithelial Cells (C57BL/6)            | Cell Biologics          | mPEC (Cell Biologics, Cat.#C57-6038)                                  | Developed from prostate tissue of pathogen-free laboratory mice.                                                                                         |
| Probe                                | <i>18S</i> ( <i>Mus musculus</i> )                     | ThermoFisher Scientific | TaqMan , assay ID Mm03928990_g1                                       |                                                                                                                                                          |
| Probe                                | <i>Hif1a</i> ( <i>Mus musculus</i> )                   | ThermoFisher Scientific | TaqMan , assay ID Mm00468869_m1                                       |                                                                                                                                                          |
| Probe                                | <i>Epas1</i> ( <i>Mus musculus</i> )                   | ThermoFisher Scientific | TaqMan , assay ID Mm01236108_m1                                       |                                                                                                                                                          |
| Probe                                | <i>Adam8</i> ( <i>Mus musculus</i> )                   | ThermoFisher Scientific | TaqMan , assay ID Mm01163449_g1                                       |                                                                                                                                                          |
| Probe                                | <i>Hyou1</i> ( <i>Mus musculus</i> )                   | ThermoFisher Scientific | TaqMan , assay ID Mm00491279_m1                                       |                                                                                                                                                          |
| Probe                                | <i>Pdk1</i> ( <i>Mus musculus</i> )                    | ThermoFisher Scientific | TaqMan , assay ID Mm00554300_m1                                       |                                                                                                                                                          |
| Probe                                | <i>Stub1</i> ( <i>Mus musculus</i> )                   | ThermoFisher Scientific | TaqMan , assay ID Mm00490634_m1                                       |                                                                                                                                                          |
| Probe                                | <i>Cpbe1</i> ( <i>Mus musculus</i> )                   | ThermoFisher Scientific | TaqMan , assay ID Mm01314928_m1                                       |                                                                                                                                                          |
| Probe                                | <i>Pgk1</i> ( <i>Mus musculus</i> )                    | ThermoFisher Scientific | TaqMan , assay ID Mm00435617_m1                                       |                                                                                                                                                          |
| Probe                                | <i>Myc</i> ( <i>Mus musculus</i> )                     | ThermoFisher Scientific | TaqMan , assay ID Mm00487804_m1                                       |                                                                                                                                                          |
| Probe                                | <i>Ldha</i> ( <i>Mus musculus</i> )                    | ThermoFisher Scientific | TaqMan , assay ID Mm01612132_g1                                       |                                                                                                                                                          |
| Probe                                | <i>Mif</i> ( <i>Mus musculus</i> )                     | ThermoFisher Scientific | TaqMan , assay ID Mm01611157_gH                                       |                                                                                                                                                          |
| Probe                                | <i>Cd74</i> ( <i>Mus musculus</i> )                    | ThermoFisher Scientific | TaqMan , assay ID Mm00658576_m1                                       |                                                                                                                                                          |
| Probe                                | <i>Cxcl1</i> ( <i>Mus musculus</i> )                   | ThermoFisher Scientific | TaqMan , assay ID Mm04207460_m1                                       |                                                                                                                                                          |
| Probe                                | <i>Pf4</i> ( <i>Mus musculus</i> )                     | ThermoFisher Scientific | TaqMan , assay ID Mm00451315_g1                                       |                                                                                                                                                          |
| Probe                                | <i>Cxcl5</i> ( <i>Mus musculus</i> )                   | ThermoFisher Scientific | TaqMan , assay ID Mm00436451_g1                                       |                                                                                                                                                          |
| Probe                                | <i>Il6</i> ( <i>Mus musculus</i> )                     | ThermoFisher Scientific | TaqMan , assay ID Mm00446190_m1                                       |                                                                                                                                                          |
| Probe                                | <i>Ccl2</i> ( <i>Mus musculus</i> )                    | ThermoFisher Scientific | TaqMan , assay ID Mm00441242_m1                                       |                                                                                                                                                          |
| Probe                                | <i>Ccl5</i> ( <i>Mus musculus</i> )                    | ThermoFisher Scientific | TaqMan , assay ID Mm01302427_m1                                       |                                                                                                                                                          |
| Probe                                | <i>Il1b</i> ( <i>Mus musculus</i> )                    | ThermoFisher Scientific | TaqMan , assay ID Mm00434228_m1                                       |                                                                                                                                                          |
| Probe                                | <i>Cd80</i> ( <i>Mus musculus</i> )                    | ThermoFisher Scientific | TaqMan , assay ID Mm00711660_m1                                       |                                                                                                                                                          |
| Probe                                | <i>Glut1</i> ( <i>Mus musculus</i> )                   | ThermoFisher Scientific | TaqMan , assay ID Mm00441480_m1                                       |                                                                                                                                                          |
| Probe                                | <i>Tnf</i> ( <i>Mus musculus</i> )                     | ThermoFisher Scientific | TaqMan , assay ID Mm00443258_m1                                       |                                                                                                                                                          |
| Probe                                | <i>Il10</i> ( <i>Mus musculus</i> )                    | ThermoFisher Scientific | TaqMan , assay ID Mm01288386_m1                                       |                                                                                                                                                          |
| Probe                                | <i>Arg1</i> ( <i>Mus musculus</i> )                    | ThermoFisher Scientific | TaqMan , assay ID Mm00475988_m1                                       |                                                                                                                                                          |
| Probe                                | <i>Cd36</i> ( <i>Mus musculus</i> )                    | ThermoFisher Scientific | TaqMan , assay ID Mm00432403_m1                                       |                                                                                                                                                          |
| Probe                                | <i>Cd206</i> ( <i>Mus musculus</i> )                   | ThermoFisher Scientific | TaqMan , assay ID Mm01329359_m1                                       |                                                                                                                                                          |
| Primers                              | B6.129- <i>Hif1a</i> <sup>tm3Rsjr/J</sup> (genotyping) | ThermoFisher Scientific | Fw: 5'-TGCAATGTGTATGGGTGTTTGG-3'<br>Rv: 5'-GAAAACGTCTGTAACTTCATTCC-3' |                                                                                                                                                          |

|          |                                                                                            |                           |                                                                                                                  |                        |
|----------|--------------------------------------------------------------------------------------------|---------------------------|------------------------------------------------------------------------------------------------------------------|------------------------|
| Primers  | STOCK <i>Epas1<sup>tm1Mc5</sup>/J</i><br>(genotyping)                                      | ThermoFisher Scientific   | Fw: 5'-GAGAGCAGCTTCTCCTGGAA-3'<br>Rv: 5'-TGTAGGCAAGGAAACCAAGG-3'                                                 |                        |
| Primers  | B6.129P2- <i>Ly2<sup>tm1(cre)Jfo</sup>/J</i><br>(genotyping)                               | ThermoFisher Scientific   | Mutant: 5'-CCCAGAAATGCCAGATTACG-3'<br>Common: 5'-CTTGGGCTGCCAGAATTCTC-3'<br>Wildtype: 5'-TTACAGTCGGCCAGGCTGAC-3' |                        |
| Antibody | Anti HIF-1α (D1S7W) XP,<br>Rabbit monoclonal                                               | Cell Signaling Technology | Cat.# 36169                                                                                                      | WB (1:2000); IP (1:50) |
| Antibody | Anti MIF, Rabbit polyclonal                                                                | Cell Signaling Technology | Cat.# 88186                                                                                                      | WB (1:3000)            |
| Antibody | Anti-phospho Stat3 (Tyr705) (D3A7)<br>XP®, Rabbit monoclonal                               | Cell Signaling Technology | Cat.# 9145                                                                                                       | WB (1:3000)            |
| Antibody | Anti-phospho Stat3 (Tyr705) (3E2),<br>Mouse monoclonal                                     | Cell Signaling Technology | Cat.# 9138                                                                                                       | WB (1:2000)            |
| Antibody | Anti p44/42 MAPK (Erk1/2) (137F5),<br>Rabbit monoclonal                                    | Cell Signaling Technology | Cat.# 4695                                                                                                       | WB (1:3000)            |
| Antibody | Anti-phospho p44/42 MAPK (Erk1/2)<br>(Thr202/Tyr204) (D13.14.4E) XP®,<br>Rabbit monoclonal | Cell Signaling Technology | Cat.# 4370                                                                                                       | WB (1:3000)            |
| Antibody | Anti NFκB p65 (D14E12) XP®, Rabbit<br>monoclonal                                           | Cell Signaling Technology | Cat.# 8242                                                                                                       | WB (1:3000)            |
| Antibody | Anti-phospho NF-κB p65 (Ser536)<br>(93H1), Rabbit monoclonal                               | Cell Signaling Technology | Cat.# 3033                                                                                                       | WB (1:3000)            |
| Antibody | APC Anti-F4/80 antibody [CI:A3-1]<br>(Allophycocyanin)                                     | Abcam                     | Cat.# ab105080                                                                                                   | FC (1:100)             |
| Antibody | APC Rat IgG2b, kappa monoclonal<br>[KLH/G2b-1-2] - Isotype control<br>(Allophycocyanin)    | Abcam                     | Cat.# ab154434                                                                                                   | FC (1:100)             |
| Antibody | FITC Anti-F4/80 [CI:A3-1]                                                                  | BioRad                    | Cat.# MCA497FB                                                                                                   | FC (1:100)             |
| Antibody | FITC Rat IgG2b, Isotype control                                                            | BioRad                    | Cat.# MCA6006                                                                                                    | FC (1:100)             |
